# Supplementary material
Source: MDPI journal article supplement (https://www.mdpi.com/2304-6740/12/1/1)
Supplement: s1 [file s1 › inorganics-2678571-supplementary.pdf]

# Supporting Information

## Engineering Bandgap of Ternary $\text{Ag}_2\text{Te}_x\text{S}_{1-x}$ Quantum Dots for Solution-processed Near-Infrared Photodetectors

Zan Wang<sup>1, 2, 3, 4</sup>, Yunjiao Gu<sup>1, 2, 3</sup>, Daniil Aleksandrov<sup>1, 2, 3</sup>, Fenghua Liu<sup>1, 2, 3</sup>, Hongbo He<sup>1, 2, 3\*</sup> and Weiping Wu<sup>1, 2, 3\*</sup>

<sup>1</sup> *University of Chinese Academy of Sciences, Beijing, 100049, China..*

<sup>2</sup> *Department of Optics and Optical Engineering, University of Science and Technology of China, Hefei, Anhui, 230026, China*

<sup>3</sup> *Laboratory of Thin Film Optics, Shanghai Institute of Optics and Fine Mechanics, Chinese Academy of Sciences, Shanghai, 201800, China.*

<sup>4</sup> *State Key Laboratory of High Field Laser Physics, Shanghai Institute of Optics and Fine Mechanics, Chinese Academy of Sciences, Shanghai, 201800, China.*

\*Corresponding authors: Hongbo He and Weiping Wu

E-mail: hbhe@siom.ac.cn; wuwp@siom.ac.cn

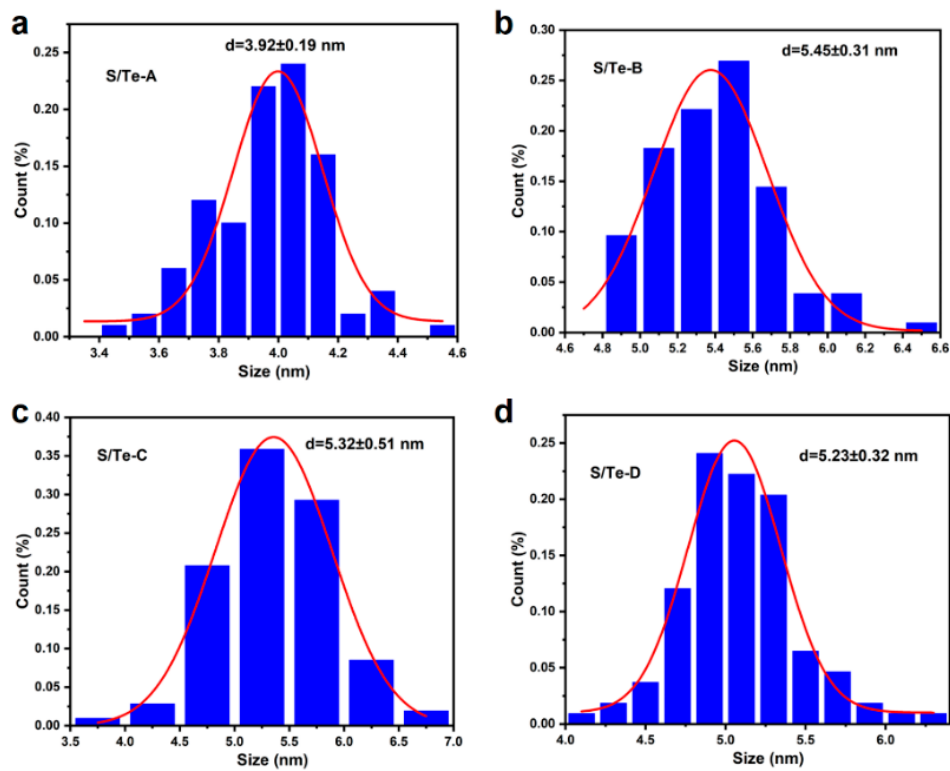

**Fig. S1.** The size distribution of  $\text{Ag}_2\text{Te}_x\text{S}_{1-x}$  QDs.

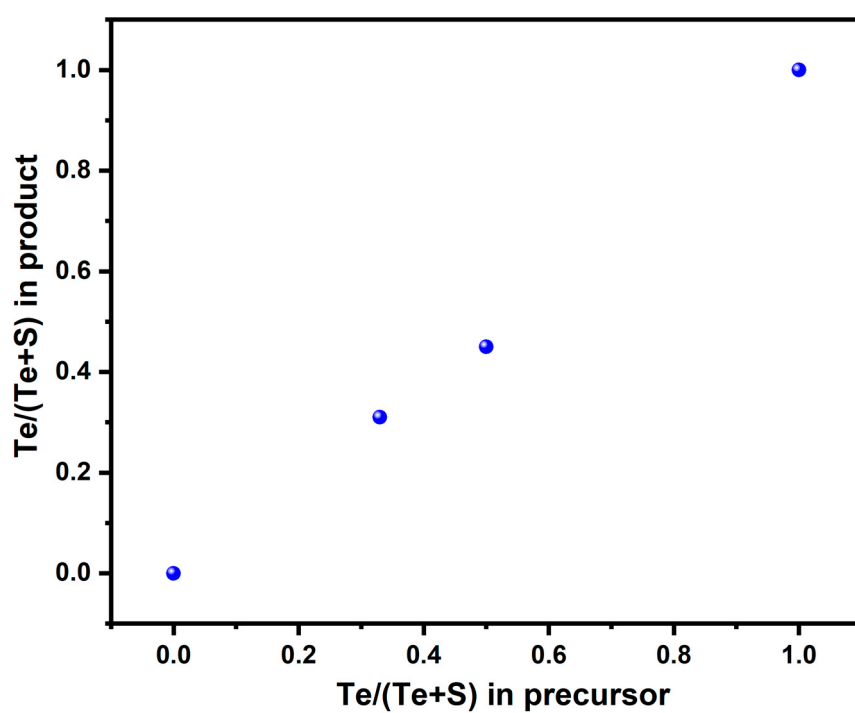

**Fig. S2.** ICP-OES data shows the relative amount of Te in the product versus the relative amount of Te in the precursor solution.

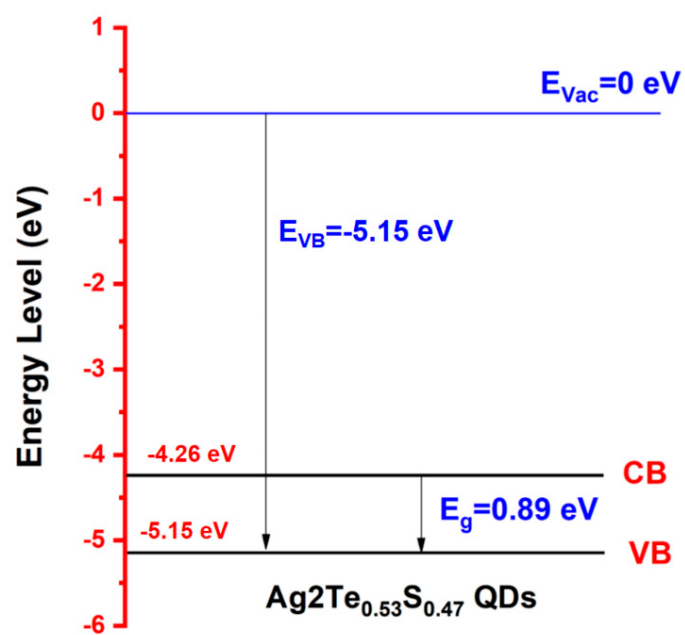

**Fig. S3.** The schematic band alignment of  $\text{Ag}_2\text{Te}_{0.53}\text{S}_{0.47}$  alloyed QDs.

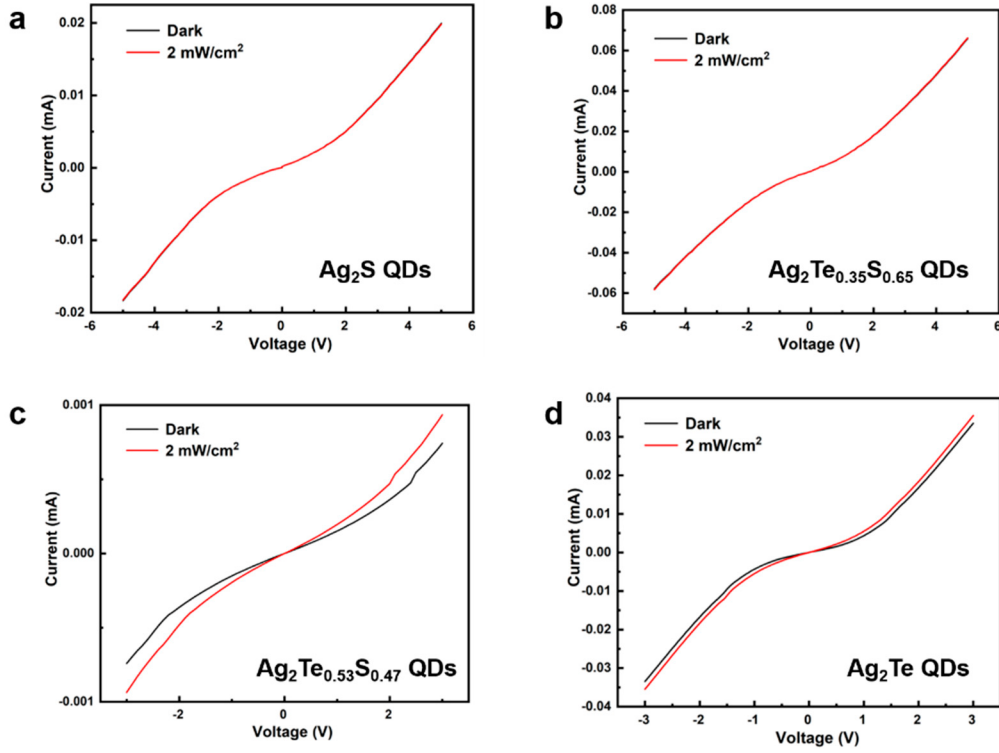

**Fig. S4.** The I-V characteristics of the fabricated  $\text{Ag}_2\text{Te}_x\text{S}_{1-x}$  QD-based PD in dark and under 1350 nm NIR light with power densities of 2  $\text{mW}/\text{cm}^2$  : (a)  $\text{Ag}_2\text{S}$  QDs; (a)  $\text{Ag}_2\text{Te}_{0.35}\text{S}_{0.65}$  QDs; (a)  $\text{Ag}_2\text{Te}_{0.53}\text{S}_{0.47}$  QDs; (d)  $\text{Ag}_2\text{Te}$  QDs.
